# Supplementary material for: CCDC106 promotes non-small cell lung cancer cell proliferation
Source: PubMed Central journal article supplement (PMC5432287; doi:10.18632/oncotarget.15792), 2017-03-01
Supplement: oncotarget-08-26662-s001.pdf [file oncotarget-08-26662-s001.pdf]

## CCDC106 promotes non-small cell lung cancer cell proliferation

### Supplementary Materials

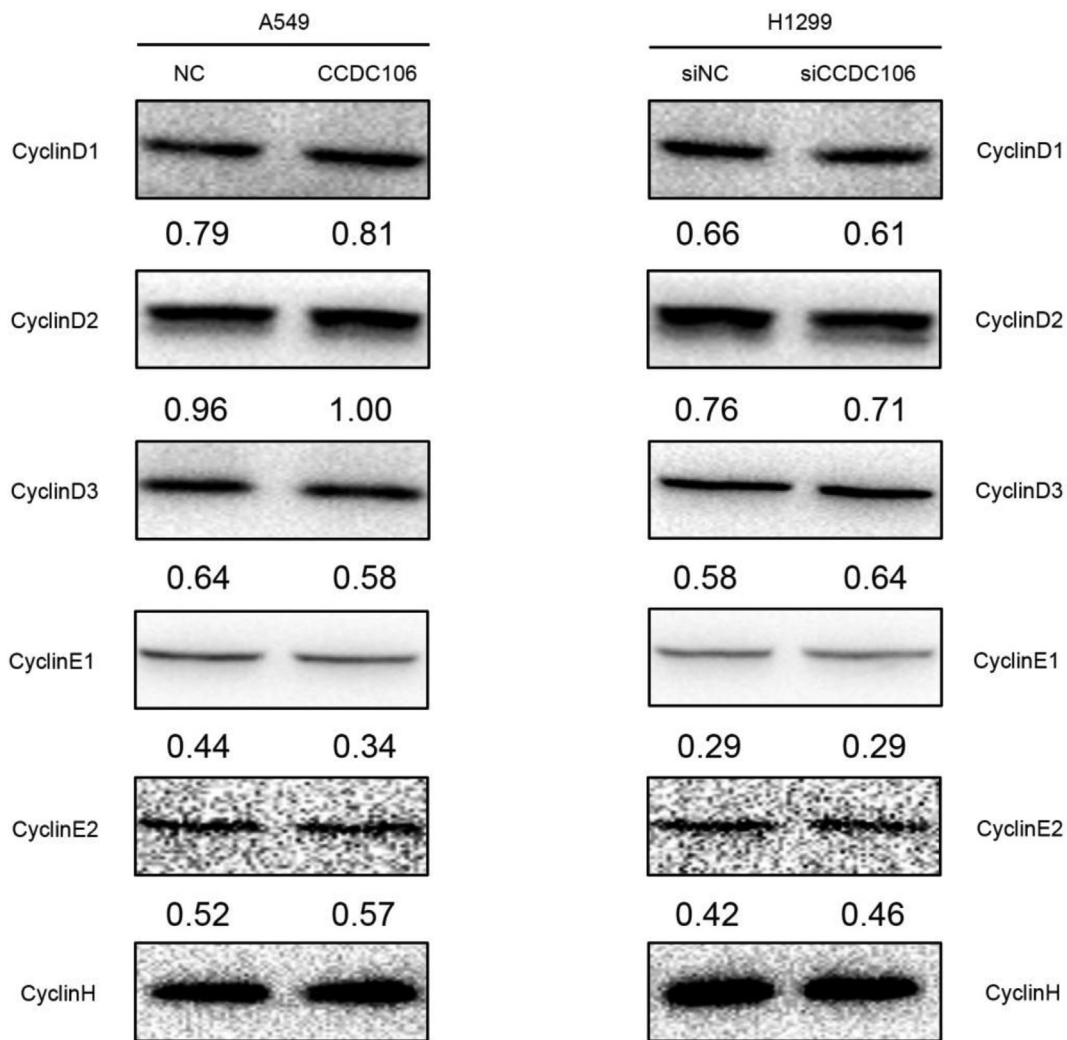

**Supplementary Figure 1: The effect on cyclin proteins by overexpressing or depleting CCDC106.** When we overexpressed or interfered CCDC106 by siRNA in A549 or H1299 cells, the cyclin proteins revealed no visible changes.

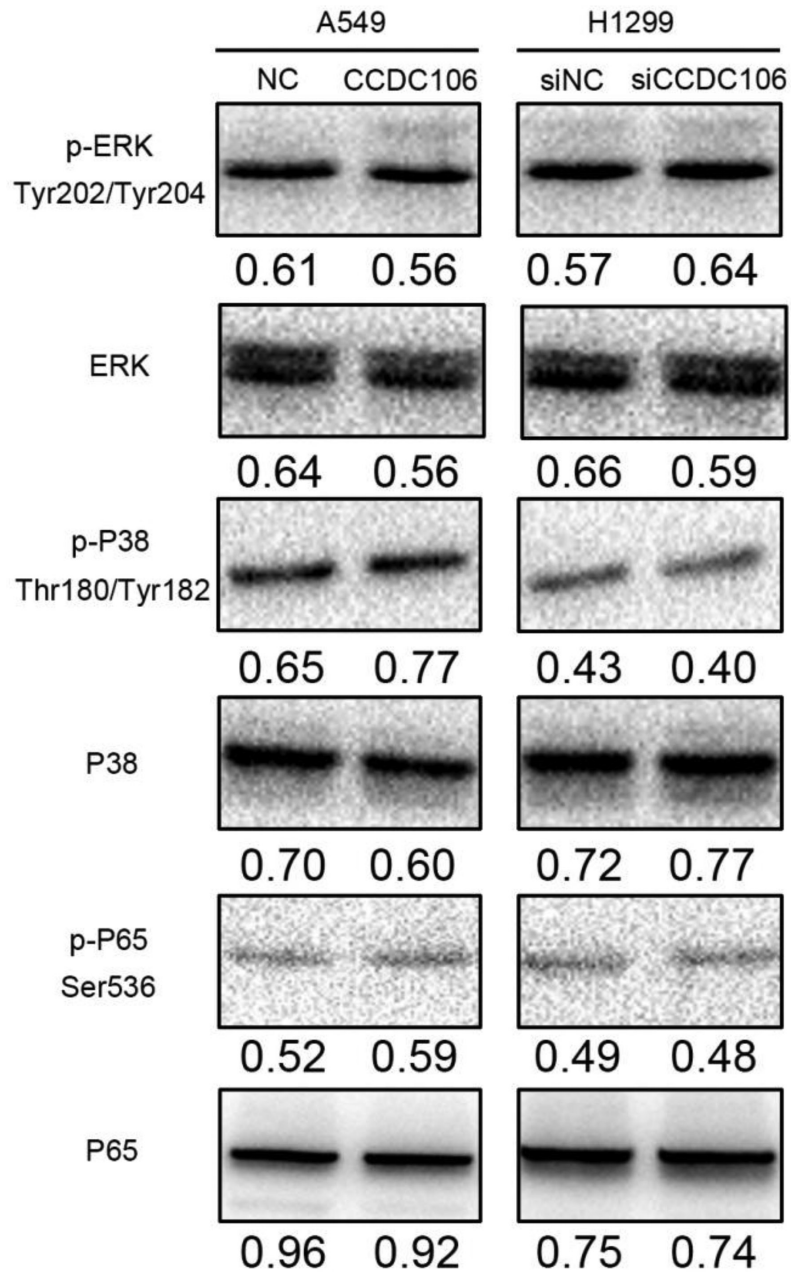

**Supplementary Figure 2: The effect on signaling pathway proteins by overexpressing or depleting CCDC106.** The expression of key signaling pathway proteins did not alter when we overexpressed or depleted CCDC106 in A549 or H1299 cells.

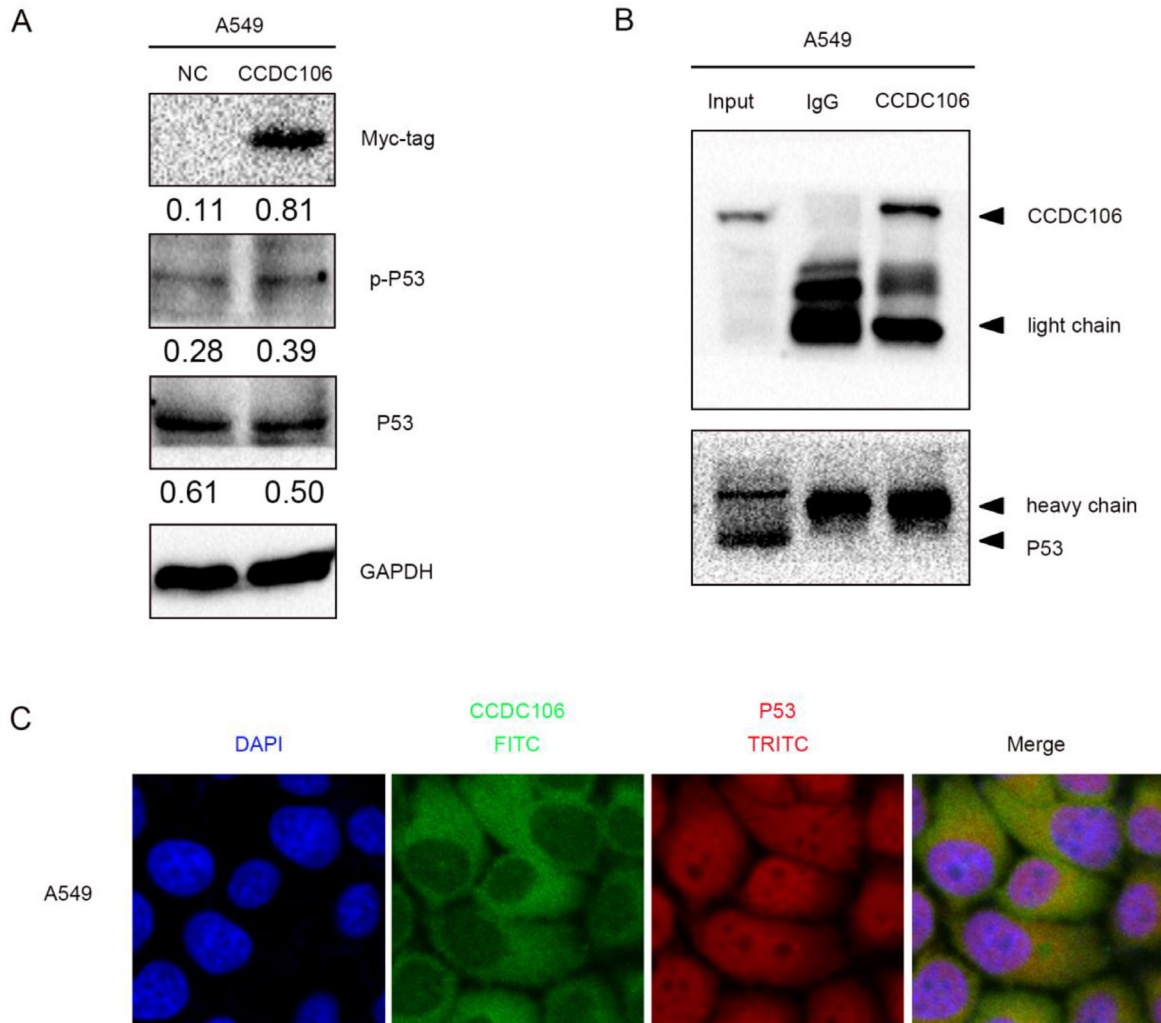

**Supplementary Figure 3: The interaction between CCDC106 and P53.** (A) When we overexpressed CCDC106 in A549 cells which harboured wild-type P53, the expression of P53 and phosphorylated P53 showed no obvious changes. (B) Co-IP assay was performed in A549 cells, it revealed that CCDC106 may not interacted with P53. (C) Immunofluorescence assay was assessed in A549 cells, the results suggested that CCDC106 localized mainly in the cytoplasm, however, P53 localized in both cytoplasm and nucleus. CCDC106 may co-localize in the cytoplasm of A549 cells.

**Supplementary Table 1: The correlation between CCDC106 expression and different hisopathology type of NSCLC**

| Clinicopathological factors             | <i>N</i> | CCDC106  |          | $\chi^2$ | <i>P</i> |
|-----------------------------------------|----------|----------|----------|----------|----------|
|                                         |          | Positive | Negative |          |          |
| Adenocarcinoma differentiation          |          |          |          |          |          |
| Well                                    | 59       | 32       | 27       | 0.807    | 0.45     |
| Moderate + Poor                         | 56       | 35       | 21       |          |          |
| Squamous cell carcinoma differentiation |          |          |          |          |          |
| Well                                    | 14       | 5        | 9        | 1.16     | 0.37     |
| Moderate + Poor                         | 52       | 27       | 25       |          |          |

**Supplementary Table 2: Correlation between CCDC106 expression and EGFR status in 73 cases NSCLC**

| Clinicopathological factors | <i>N</i> | CCDC106  |          | $\chi^2$ | <i>P</i> |
|-----------------------------|----------|----------|----------|----------|----------|
|                             |          | Positive | Negative |          |          |
| EGFR WT                     | 40       | 22       | 18       | 0.049    | 0.825    |
| EGFR Mutant                 | 33       | 19       | 14       |          |          |
